# Supplementary material for: Exploiting somatic piRNAs in Bemisia tabaci enables novel gene silencing through RNA feeding
Source: Life Sci Alliance. 2020 Aug 6;3(10):e202000731. doi: 10.26508/lsa.202000731 (PMC7425214; doi:10.26508/lsa.202000731)
Supplement: Supplementary file 1 [file LSA-2020-00731_TableS1.xls]

Scaffold	Start	End	Type
Scaffold374	1932321	1932379	miRNA
Scaffold1685	3495257	3495320	miRNA
Scaffold123	8908667	8908730	miRNA
Scaffold2229	818061	818122	miRNA
Scaffold2242	945330	945389	miRNA
Scaffold1193	1209881	1209940	miRNA
Scaffold161	1766398	1766456	miRNA
Scaffold1040	370243	370310	miRNA
Scaffold1003	37273	37335	miRNA
Scaffold653	822960	823022	miRNA
Scaffold653	803734	803802	miRNA
Scaffold653	803546	803601	miRNA
Scaffold27	950587	950648	miRNA
Scaffold297	1937885	1937946	miRNA
Scaffold5223	97531	97587	miRNA
Scaffold831	514084	514141	miRNA
Scaffold650	1465108	1465170	miRNA
Scaffold699	2154975	2155034	miRNA
Scaffold831	513917	513973	miRNA
Scaffold651	2017127	2017188	miRNA
Scaffold1003	36468	36531	miRNA
Scaffold835	2293695	2293751	miRNA
Scaffold2478	699590	699652	miRNA
Scaffold835	2293871	2293926	miRNA
Scaffold123	2423456	2423513	miRNA
Scaffold3226	1550	1609	miRNA
Scaffold109	1647742	1647801	miRNA
Scaffold232	2285466	2285524	miRNA
Scaffold69737	381	440	miRNA
Scaffold1003	40060	40119	miRNA
Scaffold6964	12115	12174	miRNA
Scaffold1003	40226	40284	miRNA
Scaffold69737	547	605	miRNA
Scaffold321	497374	497432	miRNA
Scaffold651	2017271	2017333	miRNA
Scaffold637	727656	727721	miRNA
Scaffold320	4906219	4906279	miRNA
Scaffold147	1633093	1633151	miRNA
Scaffold1003	39883	39941	miRNA
Scaffold69737	204	262	miRNA
Scaffold637	868108	868167	miRNA
Scaffold4012	149158	149218	miRNA
Scaffold3655	992	1053	miRNA
Scaffold1193	1012844	1012910	miRNA
Scaffold835	2292772	2292829	miRNA
Scaffold835	2288546	2288607	miRNA
Scaffold80	1004963	1005023	miRNA
Scaffold123	2422100	2422161	miRNA
Scaffold4012	193643	193703	miRNA
Scaffold519	2709845	2709904	miRNA
Scaffold2242	708449	708486	miRNA
Scaffold613	1940947	1941009	miRNA
Scaffold78108	2205	2265	miRNA
Scaffold3150	1753402	1753462	miRNA
Scaffold27	339461	339521	miRNA
Scaffold650	1466885	1466945	miRNA
Scaffold3080	186777	186837	miRNA
Scaffold12	1449795	1449857	miRNA
Scaffold226	3651122	3651183	miRNA
Scaffold80969	2067	2127	miRNA
Scaffold1262	36088	36137	miRNA
Scaffold2605	2069431	2069503	miRNA
Scaffold51654	1584	1656	miRNA
Scaffold2544	40230	40288	miRNA
Scaffold959	2489600	2489659	miRNA
Scaffold699	2163340	2163401	miRNA
Scaffold499	2172399	2172459	miRNA
Scaffold52	8952976	8953036	miRNA
Scaffold39	1514822	1514882	miRNA
Scaffold1685	5403487	5403547	miRNA
Scaffold80	271718	271778	miRNA
Scaffold7775	7692	7762	miRNA
Scaffold7747	1871	1928	miRNA
Scaffold5317	117571	117633	miRNA
Scaffold76311	1314	1373	miRNA
Scaffold2737	608421	608489	miRNA
Scaffold3142	219022	219076	miRNA
Scaffold1008	188825	188893	miRNA
Scaffold12	1790063	1790126	miRNA
Scaffold995	884699	884756	miRNA
Scaffold1040	363796	363854	miRNA
Scaffold29267	48166	48223	miRNA
Scaffold370	14734	14791	miRNA
Scaffold370	8301	8358	miRNA
Scaffold30735	387	478	miRNA
Scaffold370	1883	1940	miRNA
Scaffold206	1563123	1563183	miRNA
Scaffold1114	1015267	1015354	miRNA
Scaffold52916	1316	1374	miRNA
Scaffold17732	48433	48492	miRNA
Scaffold562	3054133	3054192	miRNA
Scaffold50266	13555	13613	miRNA
Scaffold1837	210324	210379	miRNA
Scaffold479	3835925	3835988	miRNA
Scaffold10598	120678	120756	miRNA
Scaffold87465	245	323	miRNA
Scaffold3347	180503	180581	miRNA
Scaffold370000	723024	723083	miRNA
Scaffold76311	1316	1375	miRNA
Scaffold844	691039	691096	miRNA
Scaffold1944	207723	207780	miRNA
Scaffold147	5674725	5674795	miRNA
Scaffold297	1938898	1938957	miRNA
Scaffold325	4236633	4236690	miRNA
Scaffold147	3663302	3663361	miRNA
Scaffold2605	4663000	4663057	miRNA
Scaffold28	2088882	2088942	miRNA
Scaffold226	2529029	2529118	miRNA
Scaffold52	6775014	6775074	miRNA
Scaffold8852	150708	150765	miRNA
Scaffold26953	428821	428886	miRNA
Scaffold52	6769792	6769852	miRNA
Scaffold835	2065081	2065138	miRNA
Scaffold835	2065082	2065139	miRNA
Scaffold591	298450	298510	miRNA
Scaffold11099	952	1013	miRNA
Scaffold18461	2987916	2987972	miRNA
Scaffold1193	1218964	1219022	miRNA
Scaffold297	1945099	1945157	miRNA
Scaffold52	6769969	6770025	miRNA
Scaffold2348	511039	511096	miRNA
Scaffold862	544616	544673	miRNA
Scaffold199	2114635	2114692	miRNA
Scaffold52	2862744	2862802	miRNA
Scaffold14023	6900	6958	miRNA
Scaffold52	6752157	6752219	miRNA
Scaffold619	1672908	1672968	miRNA
Scaffold545	3219088	3219147	miRNA
Scaffold811	22258	22314	miRNA
Scaffold80617	143	203	miRNA
Scaffold27	2633003	2633066	miRNA
Scaffold297	1947001	1947058	miRNA
Scaffold2366	432595	432645	miRNA
Scaffold15	1957468	1957526	miRNA
Scaffold15	1957466	1957524	miRNA
Scaffold338	2632560	2632611	miRNA
Scaffold2321	682	737	miRNA
Scaffold118	414677	414737	miRNA
Scaffold297	1949122	1949181	miRNA
Scaffold325	773495	773555	miRNA
Scaffold297	1949960	1950016	miRNA
Scaffold2557	3090013	3090071	miRNA
Scaffold118	1688172	1688223	miRNA
Scaffold29488	1497724	1497769	miRNA
Scaffold1063	2231483	2231541	miRNA
Scaffold297	4589144	4589202	miRNA
Scaffold1231	5639439	5639501	miRNA
Scaffold809	6614857	6614913	miRNA
Scaffold297	1950751	1950804	miRNA
Scaffold699	2465090	2465166	miRNA
Scaffold65505	948	1009	miRNA
Scaffold378	541065	541119	miRNA
Scaffold653	1124275	1124331	miRNA
Scaffold1063	2372375	2372443	miRNA
Scaffold328	1368178	1368227	miRNA
Scaffold651	1518524	1518614	miRNA
Scaffold20815	171	226	miRNA
Scaffold477	2475258	2475314	miRNA
Scaffold995	1455462	1455515	miRNA
Scaffold651	989949	990007	miRNA
Scaffold338	4088734	4088785	miRNA
Scaffold297	1948729	1948788	miRNA
Scaffold52	2325885	2325943	miRNA
Scaffold18461	2987914	2987974	miRNA
Scaffold811	3773108	3773162	miRNA
Scaffold132	5582392	5582450	miRNA
Scaffold155	2623077	2623138	miRNA
Scaffold165	6447498	6447553	miRNA
Scaffold2321	684	739	miRNA
Scaffold699	668646	668704	miRNA
Scaffold14	5694771	5694831	miRNA
Scaffold2305	10163	10217	miRNA
Scaffold1870	49229	49312	miRNA
Scaffold649	1113849	1113907	miRNA
Scaffold328	1375070	1375123	miRNA
Scaffold297	1947156	1947213	miRNA
Scaffold1496	1984958	1985020	miRNA
Scaffold365	789744	789792	miRNA
Scaffold365	771652	771700	miRNA
Scaffold1163	745483	745531	miRNA
Scaffold300	4390203	4390263	miRNA
Scaffold499	1706098	1706174	miRNA
Scaffold743	170308	170367	miRNA
Scaffold2229	773871	773928	miRNA
Scaffold317	1838306	1838368	miRNA
Scaffold321	495567	495624	miRNA
Scaffold699	2159894	2159952	miRNA
Scaffold3592	178917	178977	miRNA
Scaffold3609	824154	824211	miRNA
Scaffold27	912282	912341	miRNA
Scaffold300	2847368	2847427	miRNA
Scaffold73	415939	415998	miRNA
Scaffold29488	646404	646465	miRNA
Scaffold321	497229	497288	miRNA
Scaffold3592	177106	177167	miRNA
Scaffold321	497046	497102	miRNA
Scaffold15	1014042	1014100	miRNA
Scaffold14	9048194	9048254	miRNA
Scaffold2229	854755	854815	miRNA
Scaffold321	494989	495046	miRNA
Scaffold5317	116265	116321	miRNA
Scaffold499	2270968	2271026	miRNA
Scaffold147	534002	534062	miRNA
Scaffold995	2736588	2736648	miRNA
Scaffold562	4373494	4373550	miRNA
Scaffold988	2813580	2813638	miRNA
Scaffold4845	161527	161589	miRNA
Scaffold3080	189211	189276	miRNA
Scaffold3080	190394	190458	miRNA
Scaffold355	78141	78196	miRNA
Scaffold11841	124738	124815	miRNA
Scaffold5883	44206	44261	miRNA
Scaffold14	8300870	8300945	miRNA
Scaffold1335	379635	379700	miRNA
Scaffold835	2261632	2261707	miRNA
Scaffold52	3494209	3494293	miRNA
Scaffold641	2749519	2749599	miRNA
Scaffold809	3028890	3028951	miRNA
Scaffold12893	3848	3924	miRNA
Scaffold1090	894268	894317	miRNA
Scaffold147	1875723	1875777	miRNA
Scaffold42	23523	23582	miRNA
Scaffold130	985965	986019	miRNA
Scaffold521	1192994	1193048	miRNA
Scaffold995	534568	534650	miRNA
Scaffold22189	88	167	miRNA
Scaffold374	74938	74995	miRNA
Scaffold10070	303400	303452	miRNA
Scaffold1034	3110815	3110878	miRNA
Scaffold1090	894266	894315	miRNA
Scaffold1195	261933	262012	miRNA
Scaffold130	2148671	2148730	miRNA
Scaffold1235	468018	468097	miRNA
Scaffold4625	9195	9247	miRNA
Scaffold1195	210861	210918	miRNA
Scaffold14	7644283	7644338	miRNA
Scaffold1034	3110817	3110880	miRNA
Scaffold31093	231	331	miRNA
Scaffold130	2148674	2148731	miRNA
Scaffold63813	941	1020	miRNA
Scaffold111	620314	620369	miRNA
Scaffold75714	856	921	miRNA
Scaffold1034	2412556	2412621	miRNA
Scaffold123	6491234	6491313	miRNA
Scaffold123	6503412	6503491	miRNA
Scaffold1003	36332	36391	miRNA
Scaffold942	11585	11650	miRNA
Scaffold1034	3176115	3176173	miRNA
Scaffold637	1341986	1342042	miRNA
Scaffold649	3817918	3817969	miRNA
Scaffold707	483250	483296	miRNA
Scaffold355	1846345	1846404	miRNA
Scaffold34271	62	118	miRNA
Scaffold637	587034	587098	miRNA
Scaffold637	79378	79447	miRNA
Scaffold139	231372	231430	miRNA
Scaffold297	1948411	1948471	miRNA
Scaffold343	1171606	1171660	miRNA
Scaffold14	7644285	7644342	miRNA
Scaffold165	8248545	8248603	miRNA
Scaffold14	5431951	5432014	miRNA
Scaffold4704	1443871	1443927	miRNA
Scaffold232	2671765	2671822	miRNA
Scaffold132	540137	540199	miRNA
Scaffold619	594588	594647	miRNA
Scaffold17	194273	194332	miRNA
Scaffold1144	1295934	1295993	miRNA
Scaffold637	2474877	2474937	miRNA
Scaffold111	465124	465181	miRNA
Scaffold1685	1378896	1378963	miRNA
Scaffold21969	3208	3266	miRNA
Scaffold597	164792	164850	miRNA
Scaffold519	2274517	2274579	miRNA
Scaffold1195	1864383	1864440	miRNA
Scaffold946	1570728	1570780	miRNA
Scaffold467	834503	834562	miRNA
Scaffold5453	48648	48707	miRNA
Scaffold1003	36330	36389	miRNA
Scaffold923	1803435	1803492	miRNA
Scaffold27	7169996	7170058	miRNA
Scaffold111	341101	341164	miRNA
Scaffold2348	911619	911680	miRNA
Scaffold4159	514520	514571	miRNA
Scaffold4704	1443873	1443929	miRNA
Scaffold2816	1759428	1759480	miRNA
Scaffold1034	4189242	4189304	miRNA
Scaffold14	6798223	6798279	miRNA
Scaffold1144	1298623	1298682	miRNA
Scaffold613	1044320	1044382	miRNA
Scaffold297	1950885	1950946	miRNA
Scaffold382	3026081	3026164	miRNA
Scaffold743	23318	23378	miRNA
Scaffold1870	29763	29840	miRNA
Scaffold87	2219591	2219650	miRNA
Scaffold206	1510097	1510156	miRNA
Scaffold39	10951	11003	miRNA
Scaffold226	644986	645043	miRNA
Scaffold1063	1891013	1891071	miRNA
Scaffold2808	76110	76182	miRNA
Scaffold81795	1359	1421	miRNA
Scaffold18461	3428497	3428566	miRNA
Scaffold613	1612872	1612944	miRNA
Scaffold111	502351	502427	miRNA
Scaffold562	3372916	3372980	miRNA
Scaffold1129	1300166	1300216	miRNA
Scaffold455	1718251	1718297	miRNA
Scaffold959	3562259	3562327	miRNA
Scaffold64	144863	144918	miRNA
Scaffold477	1994257	1994332	miRNA
Scaffold2666	720115	720166	miRNA
Scaffold1195	1864387	1864444	miRNA
Scaffold321	739870	739927	miRNA
Scaffold76849	546	606	miRNA
Scaffold317	1838247	1838328	miRNA
Scaffold16276	6651670	6651751	miRNA
Scaffold6117	16551	16607	miRNA
Scaffold343	3144086	3144155	miRNA
Scaffold27	6437962	6438039	miRNA
Scaffold317	2427753	2427813	miRNA
Scaffold18461	224398	224476	miRNA
Scaffold325	2866230	2866289	miRNA
Scaffold226	4435011	4435060	miRNA
Scaffold199	251781	251838	miRNA
Scaffold5883	44752	44808	miRNA
Scaffold2366	1323370	1372416	High Exp long read locus-1
Scaffold16276	8878648	8911498	High Exp long read locus-2
Scaffold226	4304379	4331024	High Exp long read locus-3
Scaffold322	5055801	5081546	High Exp long read locus-4
Scaffold226	4087713	4102799	High Exp long read locus-5
Scaffold2366	1306006	1321494	High Exp long read locus-6
Scaffold469	1501527	1519560	High Exp long read locus-7
Scaffold1040	645187	660052	High Exp long read locus-8
Scaffold226	942807	960289	High Exp long read locus-9
Scaffold469	1563116	1582730	High Exp long read locus-10
Scaffold29121	14166	33123	High Exp long read locus-11
Scaffold226	4073705	4087182	High Exp long read locus-12
Scaffold2068	131096	144213	High Exp long read locus-13
Scaffold1040	144006	159513	High Exp long read locus-14
Scaffold1979	529025	542115	High Exp long read locus-15
Scaffold12883	133512	148371	High Exp long read locus-16
Scaffold995	1270330	1285056	High Exp long read locus-17
Scaffold165	18129	28350	High Exp long read locus-18
Scaffold27	2714710	2727798	High Exp long read locus-19
Scaffold147	823584	832073	High Exp long read locus-20
Scaffold1580	892385	902881	High Exp long read locus-21
Scaffold27	2839346	2847489	High Exp long read locus-22
Scaffold1685	3093524	3102954	High Exp long read locus-23
Scaffold942	2607910	2618854	High Exp long read locus-24
Scaffold1195	1154243	1162579	High Exp long read locus-25
Scaffold165	6331700	6338429	High Exp long read locus-26
Scaffold1685	3074363	3082691	High Exp long read locus-27
Scaffold27	5921809	5929211	High Exp long read locus-28
Scaffold811	1065845	1073154	High Exp long read locus-29
Scaffold27	6048451	6056457	High Exp long read locus-30
Scaffold831	468701	475397	High Exp long read locus-31
Scaffold1339	2478111	2485299	High Exp long read locus-32
Scaffold767	1817922	1824789	High Exp long read locus-33
Scaffold1339	2669538	2675805	High Exp long read locus-34
Scaffold374	3250054	3256092	High Exp long read locus-35
Scaffold123	4515332	4520726	High Exp long read locus-36
Scaffold4845	419162	423935	High Exp long read locus-37
Scaffold2363	659673	665877	High Exp long read locus-38
Scaffold111	595246	601339	High Exp long read locus-39
Scaffold831	3201971	3204771	High Exp long read locus-40
Scaffold226	4235670	4241165	High Exp long read locus-41
Scaffold27	2729535	2734283	High Exp long read locus-42
Scaffold545	1779858	1785098	High Exp long read locus-43
Scaffold11807	159	3827	High Exp long read locus-44
Scaffold1262	164961	168927	High Exp long read locus-45
Scaffold6329	5939	9999	High Exp long read locus-46
Scaffold297	4014699	4017630	High Exp long read locus-47
Scaffold1335	95647	98755	High Exp long read locus-48
Scaffold995	17814	21265	High Exp long read locus-49
Scaffold14	5956638	5960822	High Exp long read locus-50
Scaffold147	6354687	6355536	High Exp short read locus-1
Scaffold2366	1378576	1379870	High Exp short read locus-2
Scaffold15863	103	1060	High Exp short read locus-3
Scaffold21766	4	1386	High Exp short read locus-4
Scaffold40734	5	1988	High Exp short read locus-5
Scaffold9159	93	2154	High Exp short read locus-6
Scaffold32000	17	1649	High Exp short read locus-7
Scaffold1185	1193670	1194173	High Exp short read locus-8
Scaffold3874	2924	5006	High Exp short read locus-9
Scaffold1195	1561915	1563024	High Exp short read locus-10
Scaffold3150	34823	35549	High Exp short read locus-11
Scaffold16530	373	989	High Exp short read locus-12
Scaffold607	892236	892999	High Exp short read locus-13
Scaffold1098	46933	47883	High Exp short read locus-14
Scaffold1339	1482365	1483666	High Exp short read locus-15
Scaffold8778	40	3117	High Exp short read locus-16
Scaffold3874	5937	6604	High Exp short read locus-17
Scaffold8777	52	1409	High Exp short read locus-18
Scaffold1195	1960256	1960995	High Exp short read locus-19
Scaffold21908	293	1608	High Exp short read locus-20
Scaffold809	5566601	5567877	High Exp short read locus-21
Scaffold3609	636344	637074	High Exp short read locus-22
Scaffold317	642493	643378	High Exp short read locus-23
Scaffold657	149511	150517	High Exp short read locus-24
Scaffold31199	8812	9599	High Exp short read locus-25
Scaffold1195	1854372	1854947	High Exp short read locus-26
Scaffold57991	2719	3341	High Exp short read locus-27
Scaffold26867	53	1545	High Exp short read locus-28
Scaffold54349	13	756	High Exp short read locus-29
Scaffold3080	20264	21773	High Exp short read locus-30
Scaffold132	2067477	2068646	High Exp short read locus-31
Scaffold545	18865	21032	High Exp short read locus-32
Scaffold1898	343285	345527	High Exp short read locus-33
Scaffold12935	15698	17470	High Exp short read locus-34
Scaffold12935	13237	15049	High Exp short read locus-35
Scaffold964	251640	253263	High Exp short read locus-36
Scaffold1195	467494	469074	High Exp short read locus-37
Scaffold28	65180	66300	High Exp short read locus-38
Scaffold2605	2012156	2013245	High Exp short read locus-39
Scaffold2124	470978	471578	High Exp short read locus-40
Scaffold62023	78	857	High Exp short read locus-41
Scaffold923	313941	315554	High Exp short read locus-42
Scaffold77566	92	1358	High Exp short read locus-43
Scaffold26926	787	1991	High Exp short read locus-44
Scaffold32481	93585	94787	High Exp short read locus-45
Scaffold811	379388	380302	High Exp short read locus-46
Scaffold26341	147000	150144	High Exp short read locus-47
Scaffold320	1218283	1220640	High Exp short read locus-48
Scaffold52	188620	192625	High Exp short read locus-49
Scaffold1195	1597222	1597930	High Exp short read locus-50
Scaffold1185	1193670	1194173	siBias-1
Scaffold16530	373	989	siBias-2
Scaffold2605	2012156	2013245	siBias-3
Scaffold26867	53	1545	siBias-4
Scaffold31199	8812	9599	siBias-5
Scaffold54349	13	756	siBias-6
Scaffold132	2067477	2068646	cisNAT-5
Scaffold52	188620	192625	cisNAT-7
Scaffold607	892236	892999	cisNAT-8
Scaffold809	5566601	5567877	cisNAT-9
Scaffold923	313941	315554	cisNAT-10
Scaffold1098	46933	47883	cisNAT-13
Scaffold1195	1561915	1563024	cisNAT-14
Scaffold1195	1854372	1854947	cisNAT-15
Scaffold1195	1960256	1960995	cisNAT-16
Scaffold1339	1482365	1483666	cisNAT-17
Scaffold1898	343285	345527	cisNAT-18
Scaffold2124	470978	471578	cisNAT-19
Scaffold26341	147000	150144	cisNAT-20
Scaffold3080	20264	21773	cisNAT-21
Scaffold317	642493	643378	cisNAT-22
Scaffold320	1218283	1220640	cisNAT-23
Scaffold402	1811080	1815106	cisNAT-24
Scaffold657	149511	150517	cisNAT-25
Scaffold964	251640	253263	cisNAT-26
Scaffold545	18865	21032	cisNAT-1
Scaffold1195	467494	469074	cisNAT-2
Scaffold12935	13237	15049	cisNAT-3
Scaffold12935	15698	17470	cisNAT-4
Scaffold3592	212855	215002	cisNAT-6
Scaffold2366	1378576	1379870	cisNAT-12
Scaffold161	4967119	4971270	cisNAT-11
Scaffold10348	193	713	noBias-1
Scaffold13819	8	1242	noBias-3
Scaffold147	6354687	6355536	noBias-4
Scaffold15863	103	1060	noBias-6
Scaffold21766	4	1386	noBias-7
Scaffold21908	293	1608	noBias-8
Scaffold3150	34823	35549	noBias-9
Scaffold3874	2924	5006	noBias-10
Scaffold3874	5937	6604	noBias-11
Scaffold39	1226946	1228034	noBias-12
Scaffold147	9917602	9918815	noBias-5
Scaffold402	1571967	1575735	noBias-13
Scaffold40734	5	1988	noBias-14
Scaffold9159	93	2154	noBias-15
Scaffold98	1085470	1086502	noBias-16
Scaffold13118	2138	3635	noBias-2
Scaffold1221	1299	8323	piBias-1
Scaffold1270	3317	4371	piBias-2
Scaffold16276	40	2655	piBias-5
Scaffold185	9658	17035	piBias-6
Scaffold21494	2	3552	piBias-9
Scaffold2250	239600	243309	piBias-10
Scaffold23024	1640	4691	piBias-11
Scaffold297	5536267	5538409	piBias-12
Scaffold32000	17	1649	piBias-13
Scaffold42821	36	1636	piBias-15
Scaffold50048	31	1632	piBias-16
Scaffold62023	78	857	piBias-17
Scaffold650	982768	985516	piBias-18
Scaffold65922	4	2224	piBias-19
Scaffold74207	39	942	piBias-20
Scaffold8777	52	1409	piBias-21
Scaffold8778	40	3117	piBias-22
Scaffold14683	158	9572	piCluster-1
Scaffold161	2210675	2242661	piCluster-2
Scaffold226	4034546	4039557	piCluster-3
Scaffold2366	1323370	1372416	piCluster-4
Scaffold2666	2139989	2161192	piCluster-5
Scaffold300	230755	242751	piCluster-6
Scaffold4845	662394	680190	piCluster-7
Scaffold545	1815128	1825875	piCluster-8
Scaffold607	661607	667806	piCluster-9
Scaffold7747	4	11016	piCluster-10
Scaffold942	2254241	2285168	piCluster-11
Scaffold2145	81328	84569	hpRNA
Scaffold322	1621078	1624380	hpRNA
Scaffold16276	1623841	1625511	hpRNA
Scaffold32481	93346	95151	hpRNA
Scaffold637	1455139	1456239	hpRNA
Scaffold1685	1053117	1055478	hpRNA
Scaffold147	6354674	6355541	hpRNA
Scaffold995	340848	345600	hpRNA
Scaffold161	1164002	1164342	hpRNA
Scaffold18098	26808	27536	hpRNA
Scaffold27	447493	447674	hpRNA
Scaffold219	268297	268517	hpRNA
Scaffold4625	248087	257636	hpRNA
Scaffold123	4065115	4066115	hpRNA
Scaffold946	1652882	1657744	hpRNA
Scaffold310	1209385	1213191	hpRNA
Scaffold225	812739	817183	hpRNA
Scaffold71822	3	2353	hpRNA
Scaffold72418	8	1770	hpRNA
Scaffold17	29290	38478	hpRNA
Scaffold767	239387	246337	hpRNA
Scaffold199	3626195	3628727	hpRNA
